# Supplementary material for: Mixing of Honeybees with Different Genotypes Affects Individual Worker Behavior and Transcription of Genes in the Neuronal Substrate
Source: PLOS journal article supplement (doi:10.1371/journal.pone.0031653), 2012-02-14
Supplement: S6 (10.1371/journal.pone.0031653.s006) [file journal.pone.0031653.s006]

| Colony<br>genotypic<br>mixing | # of uncapped cells |          | $\chi^2$ |
|-------------------------------|---------------------|----------|----------|
|                               | observed            | expected |          |
| 80%L/20%H                     | 32                  | 16       |          |
|                               | 17                  | 15       |          |
|                               | 21                  | 15       |          |
|                               | 15                  | 13       |          |
|                               | 17                  | 12       |          |
|                               | 6                   | 12       |          |
|                               |                     |          | 23.9 **  |
